# Supplementary material for: NOTCH and EZH2 collaborate to repress PTEN expression in breast cancer
Source: PubMed Central journal article supplement (PMC7943788; doi:10.1038/s42003-021-01825-8), 2021-03-09
Supplement: 42003_2021_1825_MOESM1_ESM.pdf [file 42003_2021_1825_MOESM1_ESM.pdf]

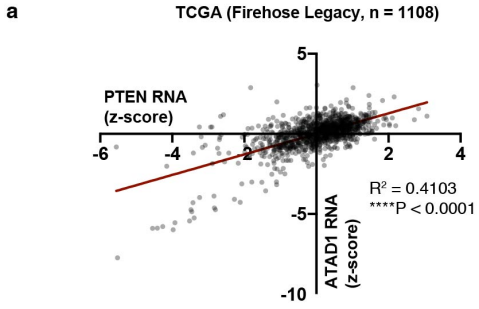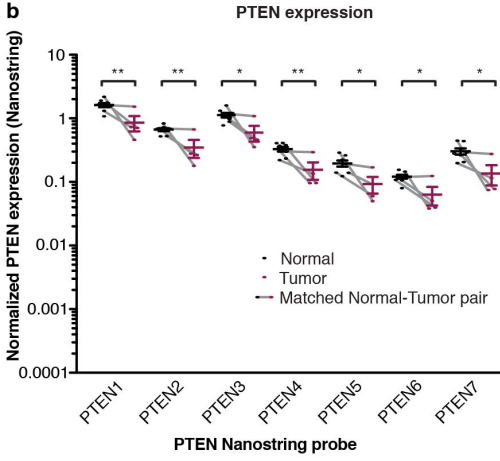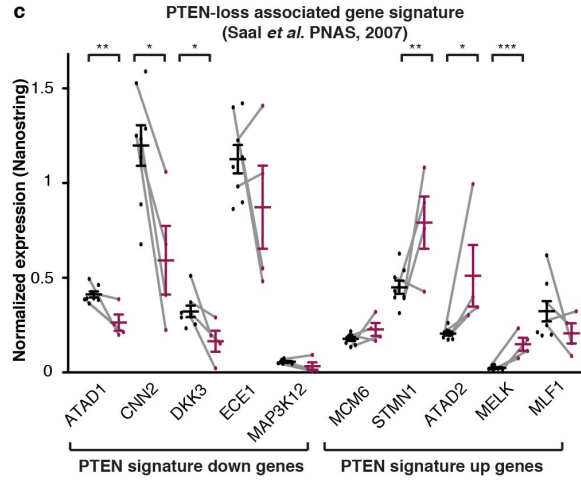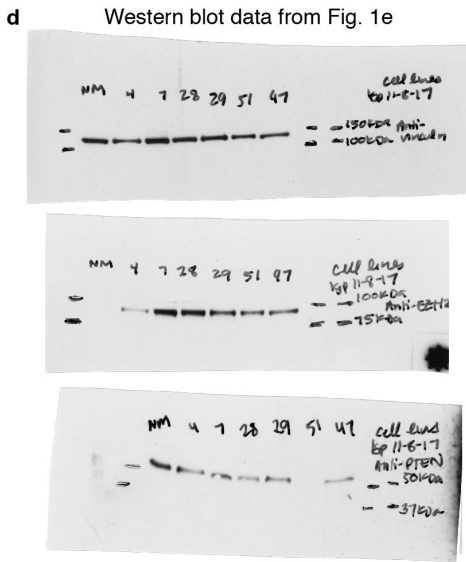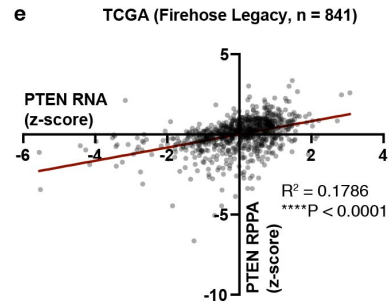

1  
2  
3  
4  
5

6 **Supplementary Figure 1: Transcriptional repression of *PTEN* and associated poor-**  
7 **prognosis gene expression signature is present in tumor but not adjacent normal**  
8 **breast samples. a** Scatter plot showing *PTEN* and *ATAD1* levels by RNA-seq (z-score)  
9 in breast cancer cases (n= 841). Linear regression was performed; trendline, R-squared  
10 ( $R^2$ ), and P-value displayed on chart <sup>1,2</sup>. Nanostring was used to measure transcript levels  
11 of **b** *PTEN* and **c** various members of the *PTEN*-loss associated gene signature <sup>3</sup> in 4  
12 normal-tumor pairs and 4 additional normal breast tissue biopsy samples. Normal shown  
13 in black, tumor in red, N-T pairs are connected by gray line. See Supplementary  
14 Spreadsheet S1 for Nanostring probes. Error Bars are mean  $\pm$  s.e.m. Significance: 2-tailed  
15 t-test, Holm-Sidak correction for multiple comparisons. (\*\* $P < 0.001$ , \*\* $P < 0.01$ , \* $P < 0.05$ )  
16 **d** Uncropped immunoblot images from Figure 1e. Vinculin is loading control. **e** Scatter  
17 plot showing *PTEN* transcript levels by RNA-seq and *PTEN* protein levels by RPPA in  
18 breast cancer cases (n= 841). Linear regression was performed; trendline, R-squared ( $R^2$ ),  
19 and P-value displayed on chart <sup>1,2</sup>.

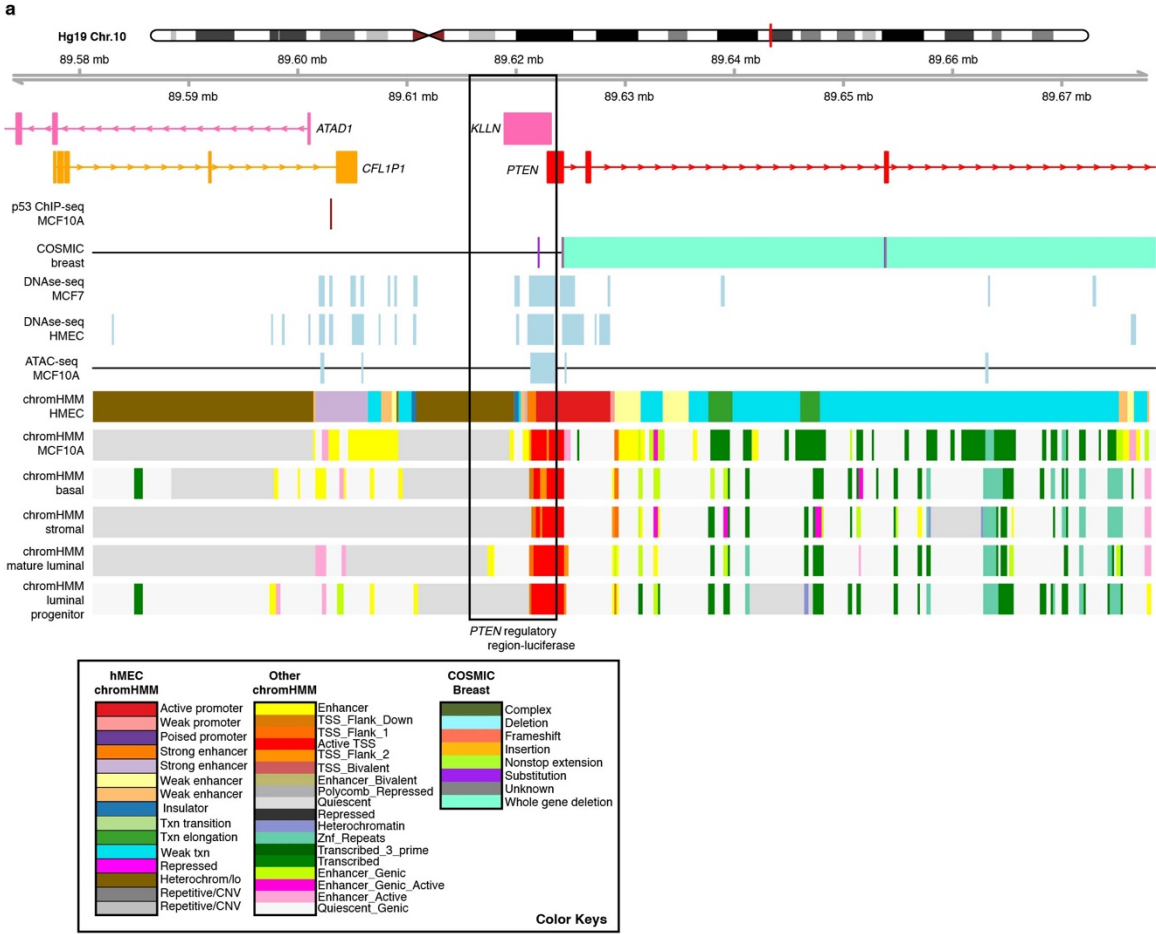

**b**  
Western blot data from Fig. 2d

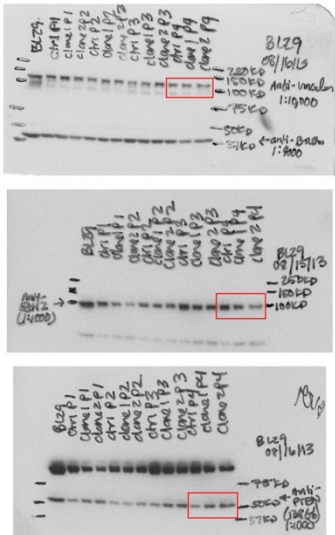

Western blot data from Fig. 2e-f

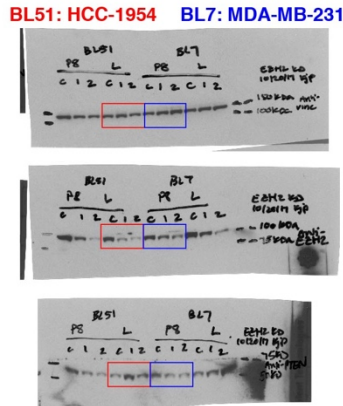

20  
21  
22

23 **Supplementary Figure 2: Transcriptional landscape of the *PTEN* promoter and**  
24 **regulatory region.** Characterization of the chromatin accessibility and transcriptional  
25 landscape of the *PTEN* promoter and upstream regulatory region including p53 ChIP-seq  
26 in MCF10A non-tumorigenic mammary epithelial cells, COSMIC genetic alterations in  
27 breast cancer, DNase-seq in MCF7 breast cancer cells and non-tumorigenic human  
28 mammary epithelial cells (HMEC), and chromHMM in HMEC and MCF10A cells (non-  
29 tumorigenic cell lines), and in basal, stromal, and luminal (mature and progenitor) breast  
30 cells. *PTEN* regulatory region analyzed in the luciferase assay in Fig. 2 is highlighted  
31 (black box). See Materials and Methods for additional detail and dataset references. **b**  
32 Uncropped blot images from Figure 2d-f. Vinculin is loading control.

33

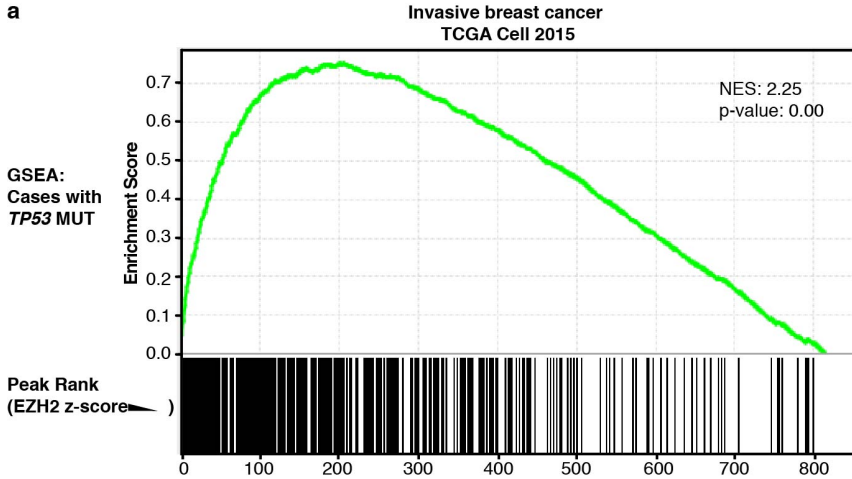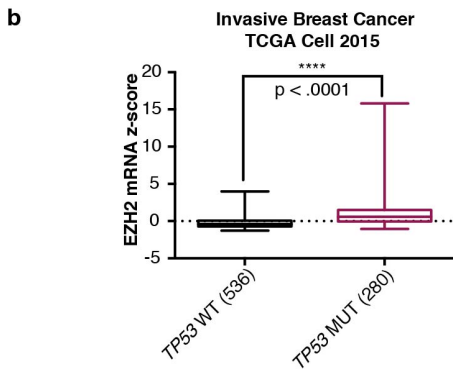

**c**

| Cell Line      | TP53 Status |
|----------------|-------------|
| HCC-1187       | MUT         |
| HCC-1954       | MUT         |
| HCC-2218       | MUT         |
| MDA-MB-231     | MUT         |
| HCC-1143       | MUT         |
| MDA-MB-175-VII | WT          |

**d** Western blot data from Fig. 5b

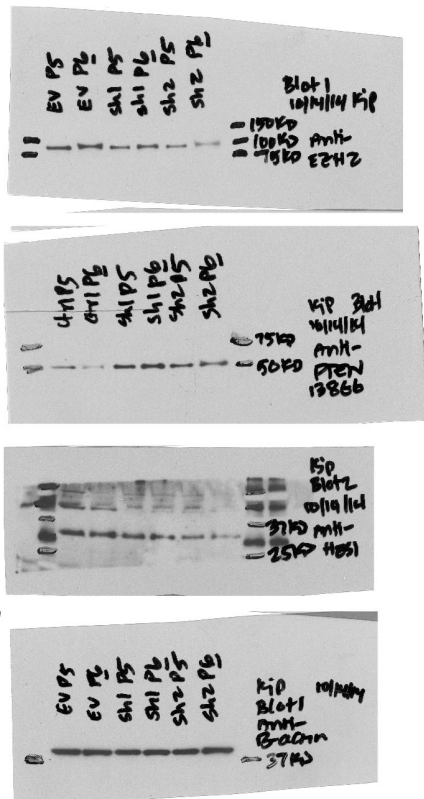

Western blot data from Fig. 5e

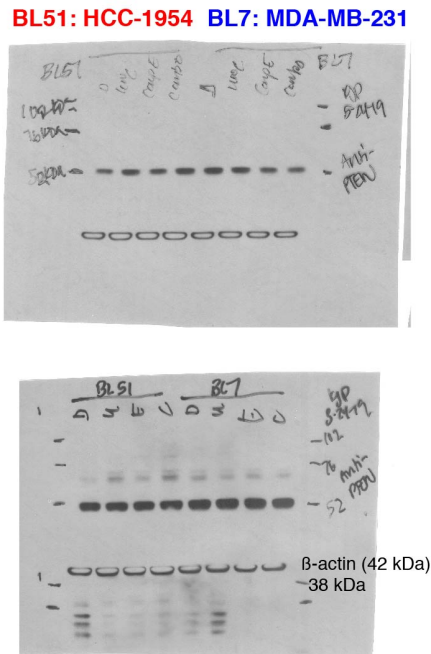

35 **Supplementary Figure 3: *TP53* mutation associates with increased expression of**  
36 ***EZH2* in breast cancer, but does not associate with restoration of *PTEN* expression**  
37 **in response to *EZH2* inhibition. a** Gene set enrichment analysis (GSEA) was performed  
38 on a list of 816 invasive breast cancer cases <sup>4</sup> pre-ordered for *EZH2* RNA-seq z-score for  
39 mutation of *TP53*. Normalized enrichment score (NES) and p-value are displayed. **b**  
40 Boxplots of *EZH2* expression in *TP53*-mutant versus wild-type case. Significance: Mann-  
41 Whitney test. Number of cases indicated for each group (total n = 816). (\*\*\*\*P<0.0001) **c**  
42 *TP53* mutation status of cell lines used in knockdown and *EZH2* inhibitor studies  
43 (cancer.sanger.ac.uk) <sup>5</sup>. **d** Uncropped blot images from Figure 5b and e.  $\beta$ -actin is loading  
44 control.

45  
46  
47  
48  
49  
50  
51  
52  
53  
54  
55  
56  
57

| Cell Line      | Subtype | ER       | PR       | HER2 |
|----------------|---------|----------|----------|------|
| HS758T         | TNBC    | Neg      | Neg      | Neg  |
| HCC-202        | HER2    | Neg      | Neg      | Pos  |
| HCC-1187       | TNBC    | Neg      | Neg      | Neg  |
| HCC-1143       | TNBC    | Neg      | Neg      | Neg  |
| HCC-1599       | TNBC    | Neg      | Neg      | Neg  |
| SUM-159        | TNBC    | Neg      | Neg      | Neg  |
| HCC-2218       | HER2    | Neg      | Neg      | Pos  |
| MDA-MB-330     | LUMB    | Pos      | Neg      | Pos  |
| HCC-1954       | TNBC    | Neg      | Neg      | Neg  |
| BT-474         | LUMB    | Pos      | Pos      | Pos  |
| HCC-1806       | TNBC    | Neg      | Neg      | Neg  |
| ZRC75-30       | LUMB    | Pos      | Neg      | Pos  |
| L56BR          | TNBC    | Neg      | Neg      | Neg  |
| MDA-MB-361     | LUMB    | Pos      | Pos/Neg* | Pos  |
| HCC-1419       | LUMB    | Pos/Neg* | Neg      | Pos  |
| MDA-MB-157     | TNBC    | Neg      | Neg      | Neg  |
| DU-4475        | TNBC    | Neg      | Neg      | Neg  |
| UACC-812       | LUMB    | Pos      | Pos/Neg* | Pos  |
| HCC-38         | TNBC    | Neg      | Neg      | Neg  |
| UACC-893       | HER2    | Neg      | Neg      | Pos  |
| BT-483         | LUMA    | Pos      | Pos/Neg* | Neg  |
| MDA-MB-231     | TNBC    | Neg      | Neg      | Neg  |
| SUM-1315       | TNBC    | Neg      | Neg      | Neg  |
| HCC-1428       | LUMA    | Pos      | Pos      | Neg  |
| MDA-MB-175-VII | LUMA    | Pos      | Neg      | Neg  |
| BT-20          | TNBC    | Neg      | Neg      | Neg  |
| HCC-1569       | HER2    | Neg      | Neg      | Pos  |
| MDA-MB-435-S   | TNBC    | Neg      | Neg      | Neg  |

58

59

60 **Supplementary Table 1: Molecular characteristics of breast cancer cell lines** <sup>6,7</sup>. Table  
61 contains (left to right) cell line name, breast cancer subtype, immunohistochemical status  
62 of estrogen receptor (ER), progesterone receptor (PR), and Her2 listed as positive (Pos) or  
63 negative (Neg). \*Cell lines listed as Pos/Neg have published values that are contradictory.

64

65

66

67

68

69

70

71

| BlockID | PatientID | N/T | ER      | PR     | Her2   |
|---------|-----------|-----|---------|--------|--------|
| 2656    | 1589      | N   | n/a     | n/a    | n/a    |
| 2568    | 1590      | N   | n/a     | n/a    | n/a    |
| 8207    | 3937      | N   | n/a     | n/a    | n/a    |
| 8216    | 3931      | N   | n/a     | n/a    | n/a    |
| 2611    | 1601      | N   | n/a     | n/a    | n/a    |
| 2614    | 1602      | N   | n/a     | n/a    | n/a    |
| 3206    | 1978      | N   | n/a     | n/a    | n/a    |
| 3194    | 1972      | N   | n/a     | n/a    | n/a    |
| 2613    | 1601      | T   | Pos/100 | Pos/50 | Neg/0  |
| 2615    | 1602      | T   | Neg/00  | Neg/00 | Pos/3+ |
| 3207    | 1978      | T   | Pos/80  | Pos/30 | Neg/1+ |
| 3196    | 1972      | T   | Neg/00  | Neg/00 | Pos/3+ |

72

73 **Supplementary Table 2: Molecular characteristics of breast cancer tumor samples**

74 **from CUMC tumor bank.** Table contains (left to right) BlockID and PatientID, normal

75 (adjacent) or tumor sample (N/T), and clinical immunohistochemistry scoring and status

76 of ER, PR, and Her2 (only available for tumor samples). Score is numerical, status is Pos

77 or Neg.

78

79

80

81

82

83

84

85

86

87

88

89



90 **Supplementary References:**  
91  
92 1 Cerami, E. *et al.* The cBio cancer genomics portal: an open platform for  
93 exploring multidimensional cancer genomics data. *Cancer discovery* **2**, 401-  
94 404, doi:10.1158/2159-8290.CD-12-0095 (2012).

95 2 Gao, J. *et al.* Integrative analysis of complex cancer genomics and clinical  
96 profiles using the cBioPortal. *Sci Signal* **6**, pl1, doi:10.1126/scisignal.2004088  
97 (2013).

98 3 Saal, L. H. *et al.* Poor prognosis in carcinoma is associated with a gene  
99 expression signature of aberrant PTEN tumor suppressor pathway activity.  
100 *Proceedings of the National Academy of Sciences* **104**, 7564-7569,  
101 doi:10.1073/pnas.0702507104 (2007).

102 4 Ciriello, G. *et al.* Comprehensive Molecular Portraits of Invasive Lobular  
103 Breast Cancer. *Cell* **163**, 506-519, doi:10.1016/j.cell.2015.09.033 (2015).

104 5 Forbes, S. A. *et al.* COSMIC: somatic cancer genetics at high-resolution. *Nucleic  
105 Acids Res* **45**, D777-D783, doi:10.1093/nar/gkw1121 (2017).

106 6 Dai, X., Cheng, H., Bai, Z. & Li, J. Breast Cancer Cell Line Classification and Its  
107 Relevance with Breast Tumor Subtyping. *J Cancer* **8**, 3131-3141,  
108 doi:10.7150/jca.18457 (2017).

109 7 Johannsson, O. T. *et al.* Characterization of a novel breast carcinoma  
110 xenograft and cell line derived from a BRCA1 germ-line mutation carrier. *Lab  
111 Invest* **83**, 387-396 (2003).  
112
